# Supplementary material
Source: Springer Nature journal article supplement (https://www.springermedizin.de/resource/supplementary/12955_2013_1280_MOESM1_ESM.pdf/9559450)
Supplement: MOESM1 [file 9559450]

A total of 107 patients with prostate cancer were enrolled and randomly assigned into one of the two groups.

54 patients completed paper-and-pencil versions first.  
(EORTC QLQ-PR25)

53 patients completed touch-screen versions first.  
(EORTC QLQ-PR25)

Washout period: 120 minutes interval

5 patients withdrew.  
49 patients completed the touch-screen versions.  
(EORTC QLQ-PR25)

3 patients withdrew.  
50 patients completed the paper-and-pencil versions.  
(EORTC QLQ-PR25)

49 patients completed the feasibility and preference of touch-screen version questionnaire.

50 patients completed the feasibility and preference of touch-screen version questionnaire.
